# Supplementary material for: Facile growth of density- and diameter-controlled GaN nanobridges and their photodetector application
Source: Royal Society of Chemistry journal article supplement (doi:10.1039/c7tc02619f), 2017-01-01
Supplement: c7tc02619f1.pdf [file c7tc02619f1.pdf]

## Supplementary Information

### Facile growth of density- and diameter-controlled GaN nanobridges and their photodetector application

Jin-Ho Kang, Muhammad Ali Johar, Bandar Alshehri, Elhadj Dogheche, Sang-Wan Ryu

#### 1. Optical characterization of GaN NB

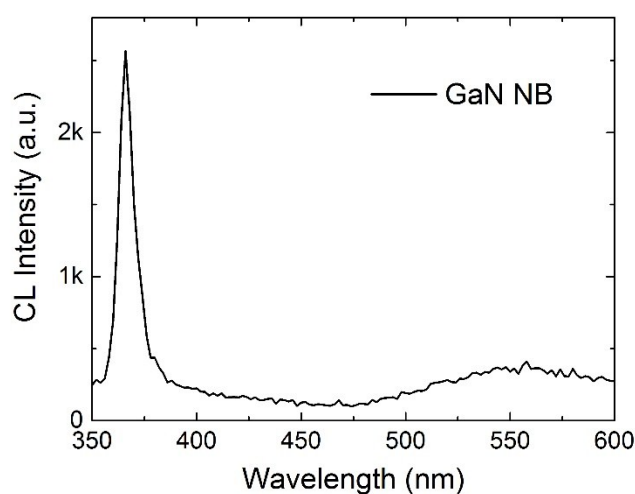

Fig. S1. Cathodoluminescence spectrum of GaN NB

#### 2. Calculation of the responsivity of NB photodetector

The responsivity of NB photodetector was calculated from the photocurrent ( $I_{ph}$ ) generated per light power incident on NBs ( $P$ ) as

$$Responsivity = \frac{I_{ph}}{P}$$

and the light power  $P$  was obtained from light intensity ( $I$ ) of the illumination source and total area of illuminated NBs. So,

$$Responsivity = \frac{I_{ph}}{I \times n \times d \times s}$$

where  $n$  is the NB density,  $d$  is the diameter, and  $s$  is the length of the NB.

For the GaN NB photodetector,  $I_{ph}$  was 95  $\mu$ A at 4 V,  $I$  was 14 mW/cm<sup>2</sup> for 325 nm illumination source,  $d$  was 40 nm, and  $s$  was 5  $\mu$ m. The  $n$  was obtained to be 30 from the density of NB ( $\sim 1 \times 10^9$ /cm<sup>2</sup>),

width (1.5  $\mu\text{m}$ ) and depth (2  $\mu\text{m}$ ) of a mesa used for the growth of NBs. Therefore, responsivity of GaN NB photodetector at 325 nm was  $1.1 \times 10^5$  A/W.

For the InGaN/GaN MQW-CS NB photodetector,  $I_{ph}$  was 105  $\mu\text{A}$  at 4 V,  $I$  was 100 mW/cm<sup>2</sup> for 405 nm illumination source,  $d$  was 100 nm, and  $s$  was 5  $\mu\text{m}$ . The  $n$  was the same as that of GaN NB because InGaN/GaN CS MQW was grown radially on GaN NBs. Therefore, responsivity of InGaN/GaN MQW-CS NB photodetector at 405 nm was  $7.0 \times 10^3$  A/W.
